# Supplementary material
Source: PubMed Central journal article supplement (PMC6719798)
Supplement: NIHMS1534920-supplement-3.pdf [file NIHMS1534920-supplement-3.pdf]

## Supplementary Information

### Live imaging of mRNA using RNA-stabilized fluorogenic proteins

Jiahui Wu<sup>1</sup>, Sara Zaccara<sup>1</sup>, Deepak Khuperkar<sup>2</sup>, Hyaeyeong Kim<sup>1</sup>, Marvin E. Tanenbaum<sup>2</sup> & Samie R. Jaffrey<sup>1\*</sup>

<sup>1</sup> Department of Pharmacology, Weill Cornell Medicine, Cornell University, New York, New York 10065, USA.

<sup>2</sup> Oncode Institute, Hubrecht Institute–KNAW and University Medical Center Utrecht, Utrecht, the Netherlands.

\*Corresponding author. E-mail: [srj2003@med.cornell.edu](mailto:srj2003@med.cornell.edu)

**Supplementary Table 1. ssDNA oligo probes used in Supplementary Figure 10a.**

|          |                                |
|----------|--------------------------------|
| Probe-1  | GTTGAGTGATTAGCGATTGATTCCGGCC   |
| Probe-2  | GTCGGATGATTTTCGTAATAGATTGCGCTG |
| Probe-3  | TTGACGTGATTTTGTGAGATTTTCCGCAG  |
| Probe-4  | TGCCTGATTGTAAGTATGTGGATTATCGG  |
| Probe-5  | GGATAGGTATGGAGGAAGTAGCTTGGA    |
| Probe-6  | ACAATATCTTGCGCCGTTTCGATCTTG    |
| Probe-7  | GGCCGCCAAGAAGAACGACCAA         |
| Probe-8  | CCTAAGAACCTAACATATCTAGCGAGG    |
| Probe-9  | TGTGCACCTTGAAGCGCATGAA         |
| Probe-10 | CCTGGGTCACGGTCACCACG           |
| Probe-11 | GCCCATGGTCTTCTTCTGC            |
| Probe-12 | GGTGCTTCACGTAGGCCTT            |
| Probe-13 | GTCACCTTCAGCTTGGCGGTC          |
| Probe-14 | GCCTCTGCTTGATCTCGCCCTTC        |
| Probe-15 | GTCTTGACCTCAGCGTCGTAGTG        |
| Probe-16 | CGGCGCGTTCGTA CTGTTCC          |
| Probe-17 | GCCGATAATCCACATACTTACAATCAGG   |

**Supplementary Table 2. ssDNA oligo probes used in RT-qPCR**

|            |                      |
|------------|----------------------|
| EYFP fw    | ACGTAAACGGCCACAAGTTC |
| EYFP rv    | CTTCATGTGGTCGGGGTAGC |
| mCherry fw | CACGAGTTCGAGATCGAGGG |
| mCherry rv | CAAGTAGTCGGGGATGTCCG |

**Supplementary Video 1. (F30-2xPepper)<sub>10</sub> tag enables visualization of mRNAs in live cells.**

U2OS cells were transiently expressing a reporter mRNA tagged with (F30-2xPepper)<sub>10</sub>. Coexpression of a fluorogenic protein, (mNeonGreen)<sub>2</sub>-tDeg, enables the visualization of this Pepper-tagged mRNA as green fluorescent puncta. These green fluorescent puncta are photostable, which enables tracking during our imaging duration. Exposure time of each frame: 200 msec. This experiment was performed three times with similar results. Scale bar, 20  $\mu$ m.

**Supplementary Video 2. Puromycin treatment liberated the Pepper-tagged reporter mRNA from the ER, and increased its mobility.**

U2OS cells were transiently expressing a reporter ER-targeting reporter mRNA and the (mNeonGreen)<sub>4</sub>-tDeg fluorogenic protein. This ER-targeting reporter mRNA encodes the first 29 amino acids of cytochrome p450, CytERM, and the encoding sequence of mCherry followed by (F30-2xPepper)<sub>10</sub> in the 3'UTR. Prior to puromycin treatment, the reporter mRNAs seen as green fluorescent puncta were tethered to the outer ER membrane, and showed low mobility. Upon puromycin (100  $\mu$ g/mL) treatment, these reporter mRNAs were liberated from the ER to the cytosol, and showed a significant mobility increase. Exposure time of each frame: 50 msec. This experiment was performed twice with similar results. Scale bar, 10  $\mu$ m.
